# Supplementary material for: Gradient Hydrogels—Overview of Techniques Demonstrating the Existence of a Gradient
Source: MDPI journal article supplement (doi:10.3390/polym14050866), 2022-02-23
Supplement: s1 [file s1]

| Characterization technique | Measured parameters                                                                                                                                                                                         | Gradient type       | Merits/Limitations                                                                                                                                                                                                                                                     |
|----------------------------|-------------------------------------------------------------------------------------------------------------------------------------------------------------------------------------------------------------|---------------------|------------------------------------------------------------------------------------------------------------------------------------------------------------------------------------------------------------------------------------------------------------------------|
| XPS                        | elemental distribution of the hydrogel surface<br>- element ratios/mole fractions of monomer<br>- cross-linking density<br>qualitative + quantitative technique                                             | Chemical + physical | - surface characterization<br>- preliminary pretreatment of the samples<br>(applies only for the lyophilized samples)                                                                                                                                                  |
| FLUO                       | characterization of inner environment or structural changes using fluorescent probes<br>qualitative + quantitative technique                                                                                | Chemical            | + applies in “wet” state<br>+ possible tracking of gradient formation in real time<br>-sensitive to pH, ionic strength and temperature changes<br>+ applies in “wet” state<br>- preliminary pretreatment of the sample<br>(labelling by hydrophilic fluorescent probe) |
| RAMAN                      | chemical structure and identity,<br>phase and polymorphism in high-water content media<br>- cross-linking density<br>qualitative + quantitative technique                                                   | Chemical + physical | + insensitive to aqueous absorption bands<br>+ doesn't need sample preparation<br>- large fluorescence background<br>(can suppress the smaller Raman signals)                                                                                                          |
| CLSM                       | three-dimensional imaging of samples (by selectively accessing the fluorescence signals from different planes)<br>-distribution of functional groups labelled by fluorescent dye<br>- cross-linking density | Chemical + physical | - preliminary pretreatment of the sample<br>(labelling by fluorescent probe)<br>- limited depth of field<br>+ applies in “wet” state                                                                                                                                   |
| FTIR                       | presence of the specific chemical/functional groups or inorganic compounds                                                                                                                                  | Chemical + physical | - sensitive to aqueous absorption bands<br>- preliminary pretreatment of the samples                                                                                                                                                                                   |

|                            | (alterations in characteristic patterns of absorption bands indicate change in the material composition)<br>qualitative technique                                                                                                                    |               | (applies for the lyophilized samples or samples dissolved in organic solvent)                                                                                                                                    |
|----------------------------|------------------------------------------------------------------------------------------------------------------------------------------------------------------------------------------------------------------------------------------------------|---------------|------------------------------------------------------------------------------------------------------------------------------------------------------------------------------------------------------------------|
| Characterization technique | Measured parameters                                                                                                                                                                                                                                  | Gradient type | Merits/Limitations                                                                                                                                                                                               |
| SEM                        | imaging of hydrogel surface and internal structure<br>- pore sizes, shapes and distribution<br>- pore interconnectivity<br>- cross-linking density<br>- wall thickness<br>- fiber orientation<br>qualitative technique                               | Physical      | + high resolution (in contrast to<br>- preliminary pretreatment of the samples (applies only for the lyophilized samples)<br>- structural artifacts<br>(freeze-drying process could cause changes in morphology) |
| POM                        | composition and three-dimensional structure<br>- direction of polymer alignment/orientation of rigid molecules based on optical anisotropy of the material<br>- absorption color and optical path boundaries between layers<br>qualitative technique | Physical      | - anisotropic hydrogels                                                                                                                                                                                          |
| micro-CT                   | 3D imaging of internal structure of hydrogels<br>- porosity<br>- cross-linking density<br>- wall thickness                                                                                                                                           | Physical      | + 3D volume reconstruction<br>- demand labeling or contrasting the hydrogel chemically<br>- limited resolution<br>- preliminary pretreatment of the samples                                                      |

|     |                                                                                                                                                    |          |                                                        |
|-----|----------------------------------------------------------------------------------------------------------------------------------------------------|----------|--------------------------------------------------------|
|     | - fiber orientation<br>qualitative technique                                                                                                       |          | (applies for the lyophilized samples)                  |
| AFM | imaging of hydrogel topography<br>- roughness<br>- pore sizes, shapes and distribution<br>- wall thickness<br>qualitative + quantitative technique | Physical | - surface characterization<br>+ applies in “wet” state |
