# Supplementary material for: Gradient Hydrogels—Overview of Techniques Demonstrating the Existence of a Gradient
Source: MDPI journal article supplement (doi:10.3390/polym14050866), 2022-02-23
Supplement: s1 [file s1]

| Abbreviation        | Meaning                                                                    |
|---------------------|----------------------------------------------------------------------------|
| XPS                 | X-ray photoelectron spectroscopy                                           |
| FLUO                | Fluorescence spectroscopy                                                  |
| HAp                 | hydroxyapatite microparticles                                              |
| GG                  | gellan gum                                                                 |
| FITC                | fluorescein isothiocyanate                                                 |
| FTIR                | Fourier transform infrared spectroscopy                                    |
| SEM                 | Scanning electron microscopy                                               |
| GelMA-M $\kappa$ CA | methacrylated kappa-carrageenan                                            |
| PLA                 | polylactic acid                                                            |
| PEG                 | polyethylene glycol                                                        |
| HEA                 | hydroxyethyl acrylate                                                      |
| NIPAM               | N-isopropylacrylamide                                                      |
| AFM                 | Atomic force microscopy                                                    |
| XRD                 | X-ray powder diffraction                                                   |
| POM                 | Polarizing optical microscopy                                              |
| micro-CT            | Computer microtomography                                                   |
| MPTMS               | organic-inorganic monomer<br>[3-(methacryloyloxy)-propyl]trimethoxy-silane |
| DMAA                | <i>N,N'</i> -dimethylacrylamide                                            |
| LAP                 | Laponite microparticles                                                    |
| NC                  | nanocomposite                                                              |
